# Supplementary material for: New Insights into the Melanophilin (MLPH) Gene Affecting Coat Color Dilution in Rabbits
Source: PubMed Central journal article supplement (PMC6162760; doi:10.3390/genes9090430), 2018-08-23
Supplement: genes-09-00430-s001.pdf [file genes-09-00430-s001.pdf]

**Table S1 : Animals used for the different experiments**

| Animal | Sexe | Breed      | Phenotype | c.111-5C>A | c.585delG | Genetic analysis | Sequence analysis | MLPH transcripts analysis |
|--------|------|------------|-----------|------------|-----------|------------------|-------------------|---------------------------|
| 1      | M    | Castor     | diluted   | mut/mut    | mut/mut   | x                |                   |                           |
| 2      | M    | Castor     | diluted   | mut/mut    | mut/mut   | x                |                   |                           |
| 3      | F    | Castor     | diluted   | mut/mut    | mut/mut   | x                |                   |                           |
| 4      | M    | Castor     | diluted   | mut/mut    | mut/mut   | x                |                   |                           |
| 5      | M    | Castor     | diluted   | mut/mut    | mut/mut   | x                |                   |                           |
| 6      | F    | Castor     | diluted   | mut/mut    | mut/mut   | x                |                   | x                         |
| 7      | F    | Castor     | diluted   | mut/mut    | mut/mut   | x                | x                 | x                         |
| 8      | F    | Castor     | diluted   | mut/mut    | mut/mut   | x                |                   | x                         |
| 9      | F    | Castor     | diluted   | mut/mut    | mut/mut   | x                |                   | x                         |
| 10     | F    | Castor     | diluted   | mut/mut    | mut/mut   | x                |                   | x                         |
| 11     | F    | Castor     | diluted   | mut/mut    | mut/mut   | x                |                   | x                         |
| 12     | M    | Castor     | diluted   | mut/mut    | mut/mut   | x                |                   | x                         |
| 13     | M    | Castor     | diluted   | mut/mut    | mut/mut   | x                |                   | x                         |
| 14     | M    | Chinchilla | diluted   | mut/mut    | mut/mut   | x                |                   |                           |
| 15     | F    | Chinchilla | diluted   | mut/mut    | mut/mut   | x                |                   |                           |
| 16     | F    | Chinchilla | diluted   | mut/mut    | mut/mut   | x                |                   |                           |
| 17     | M    | Chinchilla | diluted   | mut/mut    | mut/mut   | x                |                   | x                         |
| 18     | M    | Chinchilla | diluted   | mut/mut    | mut/mut   | x                |                   | x                         |
| 19     | F    | Chinchilla | diluted   | mut/mut    | mut/mut   | x                |                   | x                         |
| 20     | F    | Chinchilla | diluted   | mut/mut    | mut/mut   | x                | x                 | x                         |
| 21     | M    | Chinchilla | diluted   | mut/mut    | mut/mut   | x                |                   | x                         |
| 22     | F    | Chinchilla | diluted   | mut/mut    | mut/mut   | x                |                   | x                         |
| 23     | F    | Chinchilla | diluted   | mut/mut    | mut/mut   | x                |                   | x                         |
| 24     | F    | Chinchilla | diluted   | mut/mut    | mut/mut   | x                |                   | x                         |
| 25     | F    | Chinchilla | diluted   | mut/mut    | mut/mut   | x                |                   | x                         |

|    |   |        |    |         |        |   |   |   |
|----|---|--------|----|---------|--------|---|---|---|
| 26 | M | Castor | wt | mut/mut | wt/mut | x |   | x |
| 27 | F | Castor | wt | mut/mut | wt/mut | x |   | x |
| 28 | F | Castor | wt | mut/mut | wt/mut | x |   | x |
| 29 | F | Castor | wt | mut/mut | wt/mut | x |   |   |
| 30 | M | Castor | wt | wt/mut  | wt/mut | x | x | x |
| 31 | F | Castor | wt | wt/mut  | wt/mut | x |   |   |
| 32 | F | Castor | wt | wt/mut  | wt/mut | x |   | x |
| 33 | F | Castor | wt | wt/mut  | wt/mut | x |   |   |
| 34 | M | Castor | wt | wt/mut  | wt/mut | x |   | x |
| 35 | M | Castor | wt | wt/mut  | wt/mut | x |   | x |
| 36 | M | Castor | wt | wt/mut  | wt/mut | x |   |   |
| 37 | F | Castor | wt | wt/mut  | wt/mut | x |   |   |
| 38 | M | Castor | wt | wt/mut  | wt/mut | x |   | x |
| 39 | M | Castor | wt | wt/mut  | wt/mut | x |   |   |
| 40 | F | Castor | wt | wt/mut  | wt/mut | x |   |   |
| 41 | F | Castor | wt | wt/mut  | wt/mut | x |   |   |
| 42 | F | Castor | wt | mut/mut | wt/wt  | x |   |   |
| 43 | F | Castor | wt | mut/mut | wt/wt  | x |   | x |
| 44 | F | Castor | wt | mut/mut | wt/wt  | x |   | x |
| 45 | F | Castor | wt | mut/mut | wt/wt  | x |   | x |
| 46 | F | Castor | wt | mut/mut | wt/wt  | x |   |   |
| 47 | M | Castor | wt | wt/mut  | wt/wt  | x |   | x |
| 48 | M | Castor | wt | wt/mut  | wt/wt  | x |   | x |
| 49 | F | Castor | wt | wt/mut  | wt/wt  | x |   |   |
| 50 | M | Castor | wt | wt/mut  | wt/wt  | x |   | x |
| 51 | F | Castor | wt | wt/mut  | wt/wt  | x | x | x |
| 52 | F | Castor | wt | wt/mut  | wt/wt  | x |   |   |
| 53 | F | Castor | wt | wt/mut  | wt/wt  | x |   |   |
| 54 | F | Castor | wt | wt/mut  | wt/wt  | x |   |   |
| 55 | M | Castor | wt | wt/mut  | wt/wt  | x |   |   |
| 56 | M | Castor | wt | wt/mut  | wt/wt  | x |   | x |
| 57 | F | Castor | wt | wt/mut  | wt/wt  | x |   |   |
| 58 | F | Castor | wt | wt/mut  | wt/wt  | x |   |   |
| 59 | M | Castor | wt | wt/wt   | wt/wt  | x |   |   |
| 60 | F | Castor | wt | wt/wt   | wt/wt  | x |   |   |
| 61 | M | Castor | wt | wt/wt   | wt/wt  | x |   | x |
| 62 | F | Castor | wt | wt/wt   | wt/wt  | x |   |   |

|    |   |            |    |         |       |   |   |   |
|----|---|------------|----|---------|-------|---|---|---|
| 63 | F | Chinchilla | wt | mut/mut | wt/wt | x |   | x |
| 64 | F | Chinchilla | wt | mut/mut | wt/wt | x |   | x |
| 65 | M | Chinchilla | wt | mut/mut | wt/wt | x |   | x |
| 66 | M | Chinchilla | wt | mut/mut | wt/wt | x |   |   |
| 67 | F | Chinchilla | wt | mut/mut | wt/wt | x |   | x |
| 68 | F | Chinchilla | wt | mut/mut | wt/wt | x |   | x |
| 69 | M | Chinchilla | wt | mut/mut | wt/wt | x |   | x |
| 70 | F | Chinchilla | wt | mut/mut | wt/wt | x |   |   |
| 71 | F | Chinchilla | wt | mut/mut | wt/wt | x |   |   |
| 72 | F | Chinchilla | wt | mut/mut | wt/wt | x | x | x |
| 73 | F | Chinchilla | wt | wt/mut  | wt/wt | x |   | x |
| 74 | F | Chinchilla | wt | wt/mut  | wt/wt | x |   | x |

**Table S2 : List of primers**

Primers have been named based on their genomic positions on the the genome assembly OryCun 2.0

| Primer foward | Primer reverse | Sequence primer foward | Sequence primer reverse | PCR size | (Fontanesi et al.) | Use                                 |
|---------------|----------------|------------------------|-------------------------|----------|--------------------|-------------------------------------|
| 549835_WT_F   | 550013_R       | ATCCACGACCTGGACTTGG    | ACTCTGCACCCTGGTCTGAA    | 179      |                    | gDNA genotyping, c.585delG variant  |
| 549835_DEL_F  | 550013_R       | ATCCACGACCTGGACTTGA    | ACTCTGCACCCTGGTCTGAA    | 179      |                    | gDNA genotyping, c.585delG variant  |
| 537310_F      | 537790_R       | TGGACACAGTGGGAATTCAA   | AAGGCGGGGCTACAAGTC      | 481      | Ex1_1              | Sequencing gDNA ex2                 |
| 537446_F      | 537844_R       | CTGCCTCTTCTCTGTGAGC    | AAAAACTCCCATGCACTGATCT  | 399      | Ex1_2              | Sequencing gDNA ex2                 |
| 537168_F      | 537947_R       | AAGCAGAGGAGGATCTGTGC   | TGGCATTTCACTCTTTGACG    | 780      |                    | Sequencing gDNA                     |
| 543667_F      | 544025_R       | GTGAGCAGGCATGTGCAG     | GGGCTGAGCAGAGACAC       | 359      | Ex2_1              | Sequencing gDNA ex3                 |
| 543872_F      | 544270_R       | GTCAACAGCAGAAGGCAGTG   | ATGCACTCACACCACCACAC    | 399      | Ex2-3_1            | Sequencing gDNA ex3-ex4             |
| 544228_F      | 544612_R       | ACCCTGCGGGCTCCTCTA     | TCTCTCTTAGCTCTGCCTTCA   | 385      | Ex2-3_2            | Sequencing gDNA ex3-ex4             |
| 548590_F      | 549052_R       | GCTGGCTGGATAGATGGATG   | TTGAGGTCTCCAATGGTGGT    | 463      | Ex4_1              | Sequencing gDNA ex5                 |
| 548230_F      | 546319_R       | CCCTCCCATGCTCTCTCT     | CACCTTCTACCTGCCTCCAC    | 449      | Ex4_2              | Sequencing gDNA int4                |
| 548436_F      | 549032_R       | GGATGAGTGGATAGGTAGGTG  | AGCTCTGTTCTGTCTGGGGC    | 485      | Ex4_3              | Sequencing gDNA ex5                 |
| 549663_F      | 550160_R       | CTCCCTCAGTGCCACCTCT    | TGGTCCCTAACTCCCCTTG     | 498      | Ex5_1              | Sequencing gDNA ex6                 |
| 549866_F      | 553150_R       | ATCACTCCACGTGGTCC      | GACACCTCTGACGAAGGAGG    | 3284     |                    | Sequencing gDNA                     |
| 552878_F      | 553424_R       | TCGGGCTCTGTTTTAGCTTC   | TGCAGAGCCACCACACTAAG    | 546      |                    | Sequencing gDNA                     |
| 552946_F      | 553424_R       | CCCCTTCACTGTGACACC     | TGCAGAGCCACCACACTAAG    | 479      | Ex8_1              | Sequencing gDNA ex9                 |
| 557724_F      | 558123_R       | AACCTTCCAGGTCAGAAACG   | TGGGTGCAGATGACCTCAG     | 400      | Ex8_2              | Sequencing gDNA int9                |
| 560065_F      | 560521_R       | GACACGTGGGACACAGAAAG   | ACCTGGGAAAGAGAGGGACA    | 458      | Ex9_1              | Sequencing gDNA ex10-ex11           |
| 560343_F      | 560831_R       | GCACAGTACTGCCACTAAGC   | CAGTGCAGCAGTGTGGAGAC    | 489      | Ex10_1             | Sequencing gDNA ex10-ex11           |
| 561834_F      | 562231_R       | ACAGGACTCCTCCGCTCCT    | GGGCAGAACTCAGGAACA      | 397      | Ex11_1             | Sequencing gDNA ex12                |
| 563173_F      | 563633_R       | TGCACCTGAGACCCAGAGTT   | ATCCCAGTCTGCCTGATGTC    | 461      | Ex12_1             | Sequencing gDNA ex13                |
| 563840_F      | 564225_R       | GTCTCTGGGTCTGCAAGGAC   | AACAACAGCAGTCGCCATC     | 386      | Ex13_1             | Sequencing gDNA ex14                |
| 563840_F      | 568286_R       | GTCTCTGGGTCTGCAAGGAC   | CTTTGGCTCGGCTGATTCT     | 4436     | _                  | Sequencing gDNA                     |
| 566434_F      | 566832_R       | CCAGGTCCCCTTTAATGCT    | CTTCAGGGAGAGCAAGACCA    | 397      | Ex14_1             | Sequencing gDNA ex15                |
| 567904_F      | 568286_R       | ACCTGTGTGTCTGGGTCTCC   | CTTTGGCTCGGCTGATTCT     | 383      | Ex15_1             | Sequencing gDNA ex16                |
| 568244_F      | 568643_R       | TACCATGCGAGCCCCTCT     | CACGGTACTGCGTGTGACAGG   | 400      | Ex15_2             | Sequencing gDNA ex16 3'UTR          |
| 567904_F      | 568643_R       | ACCTGTGTGTCTGGGTCTCC   | CACGGTACTGCGTGTGACAGG   | 739      |                    | Sequencing gDNA ex16 3'UTR          |
| 531653_F      | 549904_R       | TGACTCGCGCTCTGACTG     | ACAAGTCCAGGAGCTGACC     | 740      |                    | Sequencing cDNA ex1-ex6             |
| 544084_F      | 560671_R       | ATGGGCTCTCTCGAGTGGTA   | CTCTCTGCCTGCTGAACCTC    | 992      |                    | Sequencing cDNA ex4-ex11            |
| 553195_F      | 568072_R       | GCTGGACCTCGTCTGACAGT   | TCAGGGCTGCTGGCCAT       | 701      |                    | Sequencing cDNA ex 9-ex16           |
| 548773_F      | 549904_R       | GCCTTGAGGAGAGAAGTGGA   | ACAAGTCCAGGAGCTGACC     |          |                    | cDNA genotyping, c.585delG variant  |
| 537546_F      | 544088_Rex3ex4 | CTGGACCTTTCCAAGCTCAC   | CCCATCTTCACTCTGGCC      | 335      |                    | cDNA wt MLPH isoform                |
| 531710_F      | 548773_Rex2ex5 | GCGACCTCCACAGGGAGACCCG | CTGGCTCAGGCCCACTGCAG    | 171      |                    | cDNA exon-skipping MLPH isoform     |
| 543867_F      | 544103_R       | TCCTGGTCAACAGCAGAA     | TACCACTCGAGAGAGCCCAT    | 145      |                    | cDNA retained intron 3 MLPH isoform |
| HPRT_F        | HPRT_R         | GGCAAAACAATGCAGACCTT   | CTTCGAGGGGTCCTTTTCAC    | 95       |                    | qPCR                                |
| 544084_F      | 548783_R       | ATGGGCTCTCTCGAGTGGTA   | GGTCGCTGTCTCCACTTCTC    | 148      |                    | qPCR_MLPH_ex4_ex5                   |
| 548773_F      | 549826_R       | GCCTTGAGGAGAGAAGTGGA   | AGGTCGTGGATGGAGAGGAG    | 118      |                    | qPCR_MLPH_ex5_ex6                   |
| 563431_F      | 566531_R       | TACAGAGCCTCCTGGTGAAG   | ACTTCCGGTCAAGAGAGACC    | 107      |                    | qPCR_MLPH_ex13_ex15                 |

**Table S3 : Haplotypes determined in Castor and Chinchilla breeds**

Genomic positions correspond to positions on the the genome assembly OryCun 2.0. Amino acid positions have been determined from NP\_001284414

|                        |                      |                   |                        |                        | Chinchilla Diluted d/d |              | Chinchilla Wild Type D/D |              | Castor Diluted d/d |              | Castor Wild Type D/D |              | Castor Wild Type D/d |              |
|------------------------|----------------------|-------------------|------------------------|------------------------|------------------------|--------------|--------------------------|--------------|--------------------|--------------|----------------------|--------------|----------------------|--------------|
| Position in OryCun 2.0 | Type of polymorphism | Gene region       | Aminoacid substitution | Haplotype in OryCun2.0 | Haplotype d1           | Haplotype d1 | Haplotype D1             | Haplotype D1 | Haplotype d2       | Haplotype d2 | Haplotype D2         | Haplotype D1 | Haplotype D2         | Haplotype d2 |
| 537253                 | Y                    | intron1           |                        | C                      | T                      | T            | T                        | T            | T                  | T            | C                    | T            | C                    | T            |
| 537285                 | Y                    | intron1           |                        | T                      | C                      | C            | C                        | C            | C                  | C            | T                    | C            | T                    | C            |
| 537316                 | Y                    | intron1           |                        | C                      | T                      | T            | T                        | T            | T                  | T            | C                    | T            | C                    | T            |
| 537374                 | Y                    | intron1           |                        | C                      | T                      | T            | T                        | T            | T                  | T            | C                    | T            | C                    | T            |
| 537396                 | R                    | intron1           |                        | G                      | A                      | A            | A                        | A            | A                  | A            | G                    | A            | G                    | A            |
| 537421                 | K                    | intron1           |                        | G                      | T                      | T            | T                        | T            | T                  | T            | G                    | T            | G                    | T            |
| 537466                 | R                    | intron1           |                        | G                      | A                      | A            | A                        | A            | A                  | A            | G                    | A            | G                    | A            |
| 537470                 | Y                    | intron1           |                        | C                      | T                      | T            | T                        | T            | T                  | T            | C                    | T            | C                    | T            |
| 537471                 | R                    | intron1           |                        | A                      | G                      | G            | G                        | G            | G                  | G            | A                    | G            | A                    | G            |
| 537490                 | Y                    | intron1           |                        | C                      | T                      | T            | T                        | T            | T                  | T            | C                    | T            | C                    | T            |
| 537524                 | R                    | 5'UTR exon2 (-10) |                        | A                      | G                      | G            | G                        | G            | G                  | G            | A                    | G            | A                    | G            |
| 537533                 | R                    | 5'UTR exon2 (-1)  |                        | G                      | A                      | A            | A                        | A            | A                  | A            | G                    | A            | G                    | A            |
| 537581                 | R                    | exon2             | R16 (synonymous)       | A                      | G                      | G            | G                        | G            | G                  | G            | A                    | G            | A                    | G            |
| 537660                 | Y                    | intron2           |                        | T                      | C                      | C            | C                        | C            | C                  | C            | T                    | C            | T                    | C            |
| 537673                 | W                    | intron2           |                        | A                      | T                      | T            | T                        | T            | T                  | T            | A                    | T            | A                    | T            |
| 537723                 | R                    | intron2           |                        | G                      | A                      | A            | A                        | A            | A                  | A            | G                    | A            | G                    | A            |
| 537842                 | Y                    | intron2           |                        | T                      | C                      | C            | C                        | C            | C                  | C            | T                    | C            | T                    | C            |
| 537902                 | Y                    | intron2           |                        | C                      | T                      | T            | T                        | T            | T                  | T            | C                    | T            | C                    | T            |
| 543686                 | complexe             | intron2           |                        | 359 pb                 | 387 pb                 | 387 pb       | 387 pb                   | 387 pb       | 387 pb             | 387 pb       | 359 pb               | 387 pb       | 359 pb               | 387 pb       |
| 543688                 | S                    | intron2           |                        | C                      | G                      | G            | G                        | G            | G                  | G            | C                    | G            | C                    | G            |
| 543694                 | W                    | intron2           |                        | A                      | T                      | T            | T                        | T            | T                  | T            | A                    | T            | A                    | T            |
| 543694                 | W                    | intron2           |                        | A                      | T                      | T            | T                        | T            | T                  | T            | A                    | T            | A                    | T            |
| 543705                 | R                    | intron2           |                        | G                      | A                      | A            | A                        | A            | A                  | A            | G                    | A            | G                    | A            |
| 543705                 | R                    | intron2           |                        | G                      | A                      | A            | A                        | A            | A                  | A            | G                    | A            | G                    | A            |
| 543755                 | c.111-5C>A           | intron2 (-5)      |                        | C                      | A                      | A            | A                        | A            | A                  | A            | C                    | A            | C                    | A            |
| 543864                 | R                    | exon3             | Q72R                   | A                      | G                      | G            | G                        | G            | G                  | G            | A                    | G            | A                    | G            |
| 543911                 | R                    | exon3             | T88A                   | A                      | G                      | G            | G                        | G            | G                  | G            | A                    | G            | A                    | G            |
| 544059                 | insG                 | intron3           |                        | -                      | insG                   | insG         | insG                     | insG         | insG               | insG         | -                    | insG         | -                    | insG         |
| 544060                 | insC                 | intron3           |                        | -                      | insC                   | insC         | insC                     | insC         | insC               | insC         | -                    | insC         | -                    | insC         |
| 544107                 | Y                    | exon4             | Y122 (synonymous)      | C                      | T                      | T            | T                        | T            | T                  | T            | C                    | T            | C                    | T            |
| 544110                 | R                    | exon4             | E123 (synonymous)      | A                      | G                      | G            | G                        | G            | G                  | G            | A                    | G            | A                    | G            |
| 544276                 | delIT                | intron4           |                        | T                      | delIT                  | delIT        | delIT                    | delIT        | delIT              | delIT        | T                    | delIT        | T                    | delIT        |
| 544277                 | delC                 | intron4           |                        | C                      | delC                   | delC         | delC                     | delC         | delC               | delC         | C                    | delC         | C                    | delC         |
| 544296                 | R                    | intron4           |                        | A                      | G                      | G            | G                        | G            | G                  | G            | A                    | G            | A                    | G            |
| 544579                 | delATTATT            | intron4           |                        | ATTATT                 | delATTATT              | delATTATT    | delATTATT                | delATTATT    | delATTATT          | delATTATT    | ATTATT               | delATTATT    | ATTATT               | delATTATT    |
| 549853                 | c.585delG            | exon6             | frameshift             | G                      | delG                   | delG         | G                        | G            | delG               | delG         | G                    | G            | G                    | delG         |
| 549877                 | Y                    | exon6             | W204R                  | T                      | C                      | C            | C                        | C            | C                  | C            | T                    | C            | T                    | C            |
| 549909                 | S                    | exon6             | S214 (synonymous)      | C                      | G                      | G            | G                        | G            | G                  | G            | C                    | G            | C                    | G            |
| 550067                 | R                    | intron6           |                        | A                      | G                      | G            | G                        | G            | G                  | G            | A                    | G            | A                    | G            |
| 550127                 | R                    | intron6           |                        | G                      | A                      | A            | A                        | A            | A                  | A            | G                    | A            | G                    | A            |
| -                      | R                    | exon7             | T240A                  | -                      | G                      | G            | G                        | G            | G                  | G            | A                    | G            | A                    | G            |

|        |   |          |                   |   |   |   |   |   |   |   |   |   |   |   |
|--------|---|----------|-------------------|---|---|---|---|---|---|---|---|---|---|---|
| -      | W | exon7    | P249 (synonymous) | - | T | T | T | T | T | T | A | T | A | T |
| -      | Y | exon7    | P250L             | - | T | T | T | T | T | T | C | T | C | T |
| 552962 | R | intron8  |                   | A | G | G | G | G | G | G | A | G | A | G |
| 553100 | R | exon8    | G298 (synonymous) | A | G | G | G | G | G | G | A | G | A | G |
| 553111 | Y | exon8    | L302P             | T | C | C | C | C | C | C | T | C | T | C |
| 553147 | S | exon8    | G314A             | G | C | C | C | C | C | C | G | C | G | C |
| 553159 | Y | exon8    | V318A             | T | C | C | C | C | C | C | T | C | T | C |
| 553329 | R | intron9  |                   | G | A | A | A | A | A | A | G | A | G | A |
| 553373 | R | intron9  |                   | A | G | G | G | G | G | G | A | G | A | G |
| 553383 | R | intron9  |                   | G | A | A | A | A | A | A | G | A | G | A |
| 557796 | Y | intron9  |                   | C | T | T | T | T | C | C | C | T | C | C |
| 557804 | Y | intron9  |                   | C | T | T | T | T | T | C | C | T | C | C |
| 557823 | M | intron9  |                   | C | A | A | A | A | C | C | C | A | C | C |
| 557825 | K | intron9  |                   | T | G | G | G | G | T | T | T | G | T | T |
| 557836 | S | intron9  |                   | C | G | G | G | G | C | C | C | G | C | C |
| 557907 | M | intron9  |                   | A | C | C | C | C | A | A | A | C | A | A |
| 560156 | R | intron9  |                   | G | A | A | A | A | G | G | G | A | G | G |
| 560195 | R | exon9    | P343 (synonymous) | A | G | G | G | G | A | A | A | G | A | A |
| 560207 | R | exon9    | A347 (synonymous) | G | A | A | A | A | G | G | G | A | G | G |
| 560233 | R | exon9    | K356R             | A | G | G | G | G | A | A | A | G | A | A |
| 560258 | Y | exon9    | N364 (synonymous) | C | T | T | T | T | C | C | C | T | C | C |
| 560309 | Y | exon9    | A381 (synonymous) | T | C | C | C | C | T | T | T | C | T | T |
| 560534 | Y | exon10   | A399 (synonymous) | T | C | C | C | C | T | T | T | C | T | T |
| 560535 | R | exon10   | S400G             | A | G | G | G | G | A | A | A | G | A | A |
| 560543 | R | exon10   | T402 (synonymous) | A | G | G | G | G | A | A | A | G | A | A |
| 560546 | Y | exon10   | P403 (synonymous) | T | C | C | C | C | T | T | T | C | T | T |
| 560621 | R | exon10   | A428 (synonymous) | A | G | G | G | G | A | A | A | G | A | A |
| 560809 | Y | intron11 |                   | C | T | T | T | T | C | C | C | T | C | C |
| 563205 | R | intron12 |                   | A | G | G | G | G | A | A | A | G | A | A |
| 563248 | R | intron12 |                   | A | G | G | G | G | A | A | A | G | A | A |
| 563283 | R | intron12 |                   | A | G | G | G | G | A | A | A | G | A | A |
| 563288 | Y | intron12 |                   | C | T | T | T | T | C | C | C | T | C | C |
| 563331 | Y | intron12 |                   | C | T | T | T | T | C | C | C | T | C | C |
| 563344 | K | intron12 |                   | G | T | T | T | T | G | G | G | T | G | G |
| 563386 | S | exon12   | V480 (synonymous) | C | G | G | G | G | C | C | C | G | C | C |
| 563408 | R | exon12   | D488S             | G | A | A | A | A | G | G | G | A | G | G |
| 563409 | R | exon12   | D488S             | A | G | G | G | G | A | A | A | G | A | A |
| 563428 | R | exon12   | P494 (synonymous) | A | G | G | G | G | A | A | A | G | A | A |
| 563512 | R | intron13 |                   | A | G | G | G | G | A | A | A | G | A | A |
| 563513 | R | intron13 |                   | A | G | G | G | G | A | A | A | G | A | A |
| 563521 | Y | intron13 |                   | T | C | C | C | C | T | T | T | C | T | T |
| 563546 | Y | intron13 |                   | T | C | C | C | C | T | T | T | C | T | T |
| 563559 | S | intron13 |                   | G | C | C | C | C | G | G | G | C | G | G |
| 563589 | W | intron13 |                   | T | A | A | A | A | T | T | T | A | T | T |
| 563672 | K | intron13 |                   | G | T | T | T | T | G | G | G | T | G | G |

|               |      |               |                   |      |      |      |      |      |      |      |      |      |      |      |
|---------------|------|---------------|-------------------|------|------|------|------|------|------|------|------|------|------|------|
| 563796        | M    | intron13      |                   | C    | A    | A    | A    | A    | C    | C    | C    | A    | C    | C    |
| 563913-563914 | delC | intron13      |                   | -    | delC | delC | delC | delC | -    | -    | -    | delC | -    | -    |
| 563915-563916 | delC | intron13      |                   | -    | delC | delC | delC | delC | -    | -    | -    | delC | -    | -    |
| 564024        | Y    | intron14      |                   | C    | T    | T    | T    | T    | C    | C    | C    | T    | C    | C    |
| 564144        | M    | intron14      |                   | C    | A    | A    | A    | A    | C    | C    | C    | A    | C    | C    |
| 564145        | Y    | intron14      |                   | C    | T    | T    | T    | T    | C    | C    | C    | T    | C    | C    |
| 564146        | R    | intron14      |                   | A    | G    | G    | G    | G    | A    | A    | A    | G    | A    | A    |
| 564149        | M    | intron14      |                   | A    | C    | C    | C    | C    | A    | A    | A    | C    | A    | A    |
| 566515        | Y    | intron14      |                   | C    | T    | T    | T    | T    | C    | C    | C    | T    | C    | C    |
| 566561        | Y    | exon14        | R534 (synonymous) | C    | T    | T    | T    | T    | C    | C    | C    | T    | C    | C    |
| 566636-566637 | insC | intron15      |                   | insC | -    | -    | -    | -    | insC | insC | insC | -    | insC | insC |
| 566636-566637 | insT | intron15      |                   | insT | -    | -    | -    | -    | insT | insT | insT | -    | insT | insT |
| 566694        | R    | intron15      |                   | G    | A    | A    | A    | A    | G    | G    | G    | A    | G    | G    |
| 567948        | M    | intron15      |                   | A    | C    | C    | C    | C    | A    | A    | A    | C    | A    | A    |
| 567979        | Y    | intron15      |                   | C    | T    | T    | T    | T    | C    | C    | C    | T    | C    | C    |
| 568000        | W    | intron15      |                   | T    | A    | A    | A    | A    | T    | T    | T    | A    | T    | T    |
| 568003        | S    | intron15      |                   | C    | G    | G    | G    | G    | C    | C    | C    | G    | C    | C    |
| 568117        | S    | exon 15 3'UTR |                   | G    | C    | C    | C    | C    | G    | G    | G    | C    | G    | G    |
| 568159        | W    | exon 15 3'UTR |                   | A    | T    | T    | T    | T    | A    | A    | A    | T    | A    | A    |
| 568160        | R    | exon 15 3'UTR |                   | G    | A    | A    | A    | A    | G    | G    | G    | A    | G    | G    |
| 568252        | R    | exon 15 3'UTR |                   | G    | A    | A    | A    | A    | G    | G    | G    | A    | G    | G    |
| 568328        | Y    | exon 15 3'UTR |                   | T    | C    | C    | C    | C    | T    | T    | T    | C    | T    | T    |
| 568385        | K    | exon 15 3'UTR |                   | T    | G    | G    | G    | G    | T    | T    | T    | G    | T    | T    |
| 568405        | R    | exon 15 3'UTR |                   | G    | A    | A    | A    | A    | G    | G    | G    | A    | G    | G    |
| 568443        | R    | exon 15 3'UTR |                   | A    | G    | G    | G    | G    | A    | A    | A    | G    | A    | A    |
| 568452        | Y    | exon 15 3'UTR |                   | C    | T    | T    | T    | T    | C    | C    | C    | T    | C    | C    |
| 568470        | Y    | exon 15 3'UTR |                   | T    | C    | C    | C    | C    | T    | T    | T    | C    | T    | T    |
| 568512        | Y    | exon 15 3'UTR |                   | C    | T    | T    | T    | T    | C    | C    | C    | T    | C    | C    |
| 568531        | S    | exon 15 3'UTR |                   | C    | G    | G    | G    | G    | C    | C    | C    | G    | C    | C    |
| 568537        | R    | exon 15 3'UTR |                   | A    | G    | G    | G    | G    | A    | A    | A    | G    | A    | A    |
| 568558        | Y    | exon 15 3'UTR |                   | C    | T    | T    | T    | T    | C    | C    | C    | T    | C    | C    |

**Figure S1 : cDNA sequence of the *MLPH* gene**

The full cDNA *MLPH* sequence from exon 1 to exon 16 is represented with odd and even exons respectively in purple and black. The START (ATG) and STOP (TGA) codons are in black boxes. Polymorphisms that were identified are mentioned with the IUPAC ambiguity code. Pairs of primers that were used in Figure 3 are highlighted (couple 1 in yellow, couple 2 in grey, couple 3 in blue and couple 4 in pink).

AGGGTCCGGAGCGCGCCCTCAGCCTTGCGCCGCGCGCCCTGCCTGGCCCCGATCACCCCGCCTCGCCCCAGAGCGCCC **TGACTCGCGCTCTGACTG** GCCGCGGTCTC  
TCCCTTGAGGGCCCGGACCGGCGCTTA **GCGACCTCCACAGGGAGACCCG** GTGTGACCCTGCCCRGAAGCAGAR **ATG** GGGAGAAA **CTGGACCTTTCCAAGCTCA**  
**CGGACGACGAGGCCAGRCACGTCTGGGAGGTCGTGCAGCGAGACTTCGACCTCAGGAGGAAAGAGGAAGAGAGA** **CTGCA** GGGCTTGAAGGCCAGATTCAGAGG  
GAGAGCTCCAAGAGGGAGCTGCTCGCCGACACGGCGCACCTGAACGAGACGCACTGCGCCCGCTGCCTGCGGCCCTACCRGC **TCCTGGTCAACAGCAGAA** GGCAG  
TGCCTGCACTGCGGCCTCTTCRCCTGCAGGAGCTGCAGCCGCGCCACCCGAGGAGCAGGGCTGGCTCTGTGACCCCTGCCACCT **GGCCAGAGTGGTGAAG** **ATGG**  
**GCTCTCTCGAGTGTA** CTAYGAR **CACGTGCGGGCCCGCTTCAAGCGATTCCGCAGCGCAAGGTGATCCGGTCCCTGTACGGGCGGCTGCAGCAGGGAG** **GTGGCC**  
**TGAGCCAG** GCCTTGAGGAGAGAAGTGGAGACAGCGACCTGGCAGATGAGCATGGAGAGCCAGACGCGGGGGCCAGGCCACCTCTCGGCACCAAAAAGC  
GGCTCCTCTCCATCCACGACCTGGACTTG **C** AGGCGGACTCGGATCACTCCACGYGGTCTGT **GGTCAGCTCCTGGACTTGT** CCTCSGAGGCTGAGGCCACGGGCAGC  
CTGCAGTCCCTCACAGGTGAGCCCCACACCTGGGAGACCCTCCAGGAGACGRCCGTCTGGAGGAAGCTGACCCAGGGCCTCCGAGTGCCAGCCCCCTGCA  
GAACC **WCY** GGGCGGCCTCTCGCCCTCCAGACGGGAGGCCCGAGGAGCCCTGCCAGCCCGGAACCACCAGCAGCACGGGCTGGGGCTTGCCGCGCTCCAGGG  
ACGGCCTCTGGCAGCAGTGGRCAGCTCCCCYGCAGTGCCAGGCCGACGTGGACACCTCTGACGAAGSAGGCACTGGGGYAGCCTCGGCGGCTGGCCCCACCCCA  
GACGCTGGAGCTGGACCTCGTCTGACAGTCAGCCCCAGCTGCCGGGCC **R** ACTCAGCGGCRGACACGGAGGAGGAGGCCCTCAGGAR **A** AAGGCTGGAGGAGCTGA  
CCAGCAA **Y** GTCAGCGACCAGGAGGAGGAAGAGGGAGAGCCGGCCGGCGGGGACCACGYGGGGCTCTCCCCCGGGTCCCGGCAGGACCCAGCACAGGTGTGC  
ACAGACGCY **YR** GCCAAC **RCCY** GGCCGGGGACAGAGCCCTCAGGGCGCCGGGGGCCCGCCAGCCAGCAGGAGCACAGACGAGCAGCTGTCCGGR **R** CTGGAGGA  
CAGGTGGCGGCCGCGCCTCCGAGGTTACGAGGCAGAGAGCGAGGTGTCCGCTATCGAGTCCAGGATTGCTGCCTTGAGGGCTGCGGGGCTCACGGTGAAGCC  
**TCGGAAAGCCCCGGAGGAAATCGAACCTCCCGATCTTTGT** **S** CCCCCGCTTCTCGGACCCCC **RR** CAAGCGTCCAGAGGACCC **R** GATACAGAGCCTCCTGGTGAAG  
CCAAGGACGAGACCGTGCCCTACCTTCTGCGGAGAAAGTACTCCCCAGAGGTCAAGGCAAAGATGAGGTCTCTTTGACCGGAAGTCCCCGTACCGYGGCTCCCT  
GACCCAGAGGAACCCAGCAGGAGGAGGGAGCGGCCAGCGCCATCTTACGAAGCCCGTGATGGCCAGCAGCCC **TGA** AGGGAGCAGGCAGAGCAGCGACCT  
GGCCCCACGCCGGCTTCCCT **S** CCCTGGCTCTCGCTGTCTGCTCTCCGTGGCCGGCGGCCCGG **WR** AGAAGCATCCGCCCGTGTGGCCCCGCCTGCCAGAGCCTCAGG  
CCCCCTCGCTGCCACCAGCTTCTCCGACGACCTCCAAGGCTACCATGCRAGCCCTCTGGGCCAAGAATCAGCCGAGCCAAAGAGACTCTGGACAGTGTAGAC



**Figure S2 : Wild type Mlph protein in rabbit**

10 20 30 40 50 60 70 80 90  
ATGGGGAGAAAACCTGGACCTTTCCAAGCTCACGGACGACGAGGCCAGRCACGTCTGGGAGGTCTGTCAGCGAGACTTCGACCTCAGGAGGAAAGAGGAAG 100  
M G R K L D L S K L T D D E A R H V W E V V Q R D F D L R R K E E E 34  
AGAGACTGCAGGGCTTGAAGGGCCAGATTCAAGAGGGAGAGCTCCAAGAGGGAGCTGCTCGCCGACACGGCGCACCTGAACGAGACGCACTGCGCCCCGCTG 200  
R L Q G L K G Q I Q R E S S K R E L L A D T A H L N E T H C A R C 67  
CCTGCGGCCCTACCRGCTCCTGGTCAACAGCAGAAGGCAGTGCCTGCACTGCGGCCCTCTTCRCCTGCAGGAGCTGCAGCCGCGCCCACCCCGAGGAGCAG 300  
L R P Y X L L V N S R R Q C L H C G L F X C R S C S R A H P E E Q 100  
GGCTGGCTCTGTGACCCCTGCCACCTGGCCAGAGTGGTGAAGATGGGCTCTCTCGAGTGGTACTAYGARACACGTGCGGGCCCCGCTTCAAGCGATTTCGGCA 400  
G W L C D P C H L A R V V K M G S L E W Y Y E H V R A R F K R F G S 134  
GCGCCAAGGTGATCCGGTCCCTGTACGGGCGGCTGCAGCAGGGAGGTGGGCTGAGCCAGGCCTTGAGGAGAGAAGTGGAGACAGCGACCTGGCAGATGA 500  
A K V I R S L Y G R L Q Q G G G P E P G L E E R S G D S D L A D E 167  
GCATGGAGAGCCAGACGCGGGGGCCCAGGCCCCACCTCTCGGCACCAAAAAAAGCGGCTCCTCTCCATCCACGACCTGGACTTGGAGGCGGACTCGGAT 600  
H G E P D A G A Q A P P L G T K K K R L L S I H D L D L E A D S D 200  
CACTCCACGYGGTCCTGTGGTCAGCTCCTGGACTTGTCTCSGAGGCTGAGGCCACGGGCAGCCTGCAGTCCCTCACAGGTGAGCCCCACACCTGGGAGA 700  
H S T X S C G Q L L D L S S E A E A T G S L Q S L T G E P H T W E T 234  
CCACCTCCCAGGAGACGRCCGTCTGGAGGAAGCTGACCCAGGGGCCTCCGAGTGCCAGCCCCCTGCAGAACCWCYGGGCGGCCTCTCGCCCTCCAGACG 800  
T S Q E T X V L E E A D P G A S E C Q P P A E P X G G L S P S R R 267  
GGAGGCCCCCGAGGAGCCCTGCCAGCCCAGAACACCAGCAGCACGGGCTGGGGCTTGCCGCGGCTCCAGGGACGGCCTCTGGCAGCAGTGGRCAGCTC 900  
E A P E E P C Q P G T T S S T G L G L A A A P G T A S G S S G Q L 300  
CCCCYGCAGTGCCAGGCCGACGTGGACACCTCTGACGAAGSAGGCACTGGGGYAGCCTCGGCGGCTGGCCCCACCCAGACGCTGGAGCTGGACCTCGT 1000  
P X Q C Q A D V D T S D E X G T G X A S A A G P H P R R W S W T S S 334  
CTGACAGTCAGCCCCAGCTGCCGGGGCCRACTCAGCGGCRGACACGGAGGAGGAGGCCCTCAGGARAAAGGCTGGAGGAGCTGACCAGCAAYGTCAGCGA 1100  
D S Q P P A A G P H S A A D T E E E A L R X R L E E L T S X V S D 367  
CCAGGAGGAGGAAGAGGGAGAGCCGGCCGGCGGGGACCACGCYGGGGCTCTCCCCCGCGGTCCCGGCAGGACCCAGCACAGGTGTGCACAGACGCYRGC 1200  
Q E E E E G E P A G G D H A G A L P P R S R Q D P A Q V C T D A X 400  
CCAACRCCYGGCCGGGACAGAGCCCTCAGGGCGCCGGGGCCCCGCCCAGCCCAGCAGGAGCACAGACGAGCAGCTGTCCGGCRCTGGAGGACAGGGTGG 1300  
P T P G R G Q S P Q G A G G P A Q P S R S T D E Q L S A L E D R V A 434  
CGGCCGCGGCCTCCGAGGTTTCAGCAGGCAGAGAGCGAGGTGTCCGCTATCGAGTCCAGGATTGCTGCCTTGAGGGCTGCGGGGCTCACGGTGAAGCCCTC 1400  
A A A S E V Q Q A E S E V S A I E S R I A A L R A A G L T V K P S 467  
GGGAAAGCCCCGGAGGAAATCGAACCTCCCGATCTTTGTSCCCCGGCTTCTCGGGACCCCCRCAAGCGTCCAGAGGACCCRGATAACAGAGCCTCCTGGT 1500  
G K P R R K S N L P I F V P R L L G T P X K R P E D P D T E P P G 500  
GAAGCCAAGGACGAGACCGTGCCTACCTTCTGCGGAGAAAGTACTCCCCAGAGGTCAAGGCAAAGATGAGGTCTCTCTTGACCGGAAGTCCCCGTACC 1600  
E A K D E T V P Y L L R R K Y S P R G Q G K D E V S L D R K S P Y R 534  
YGGCTCCCTGACCCAGAGGAACCCAGCAGGAGGAGGGGAGCGCCAGCGCCATCTTACGAAGCCCGTGATGGCCCAGCAGCCCTGA 1700  
G S L T Q R N P S R R R G A A S A I F T K P V M A Q Q P \* 562
